# Supplementary material
Source: PubMed Central journal article supplement (PMC3894676)
Supplement: Supp_Fig1.pdf [file Supp_Fig1.pdf]

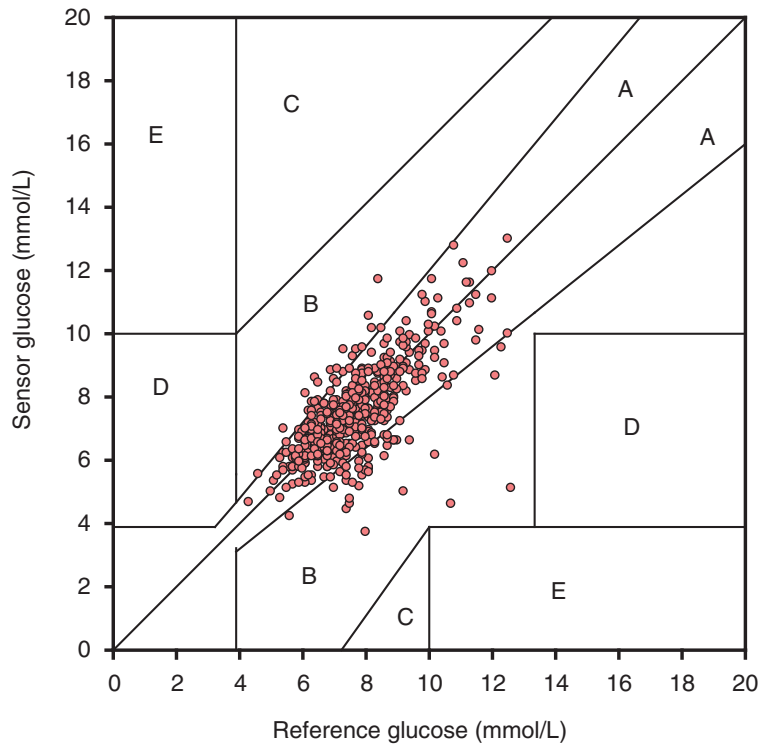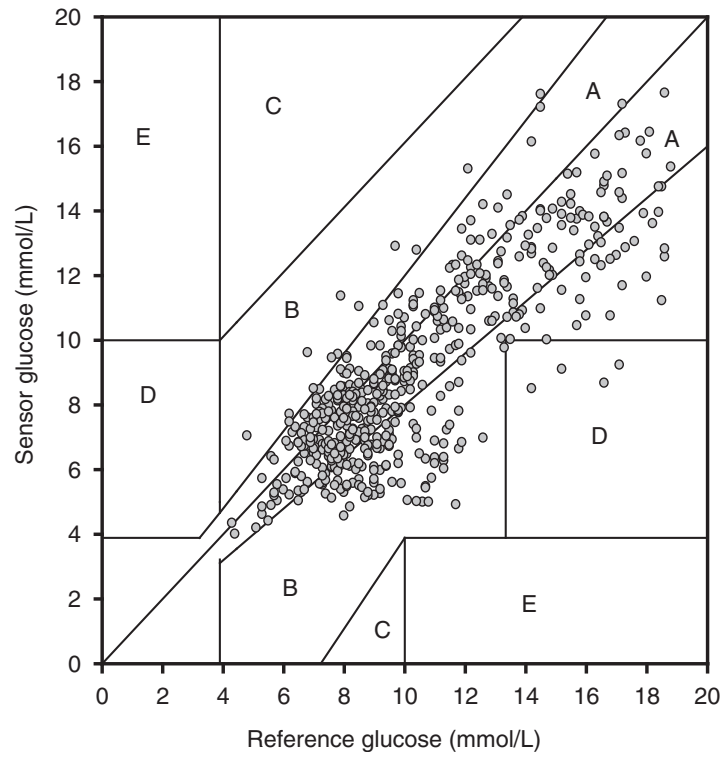

**SUPPLEMENTARY FIG. S1.** Clarke error grid using **(top panel)** the enhanced calibration protocol and **(bottom panel)** the standard calibration protocol (manufacturer's instructions).
