# Supplementary material
Source: PubMed Central journal article supplement (PMC3894676)
Supplement: Supp_Table1.pdf [file Supp_Table1.pdf]

## Supplementary Data

SUPPLEMENTARY TABLE S1. BASELINE CHARACTERISTICS, NUTRITIONAL INTAKE, AND CORTICOSTEROID AND INOTROPE TREATMENT OF THE STUDY POPULATION

|                           | <i>Enhanced calibration</i><br>(n=12) | <i>Standard calibration</i><br>(n=12) |
|---------------------------|---------------------------------------|---------------------------------------|
| Age (years)               | 62.8±16.0                             | 58.3±12.5                             |
| Male sex                  | 9 (75%)                               | 9 (75%)                               |
| APACHE II score           | 12.9±5.0                              | 11.2±3.4                              |
| Total CHO (g/h)           | 7.1 (2.2)                             | 7.9 (1.6)                             |
| Feeding interruptions/day | 2 (0, 2)                              | 1 (0, 1.5)                            |
| Treatment                 |                                       |                                       |
| Corticosteroid            | 5 (42%)                               | 3 (25%)                               |
| Inotrope                  | 5 (42%)                               | 4 (33%)                               |
| Reason for ICU admission  |                                       |                                       |
| Medical                   | 1 (8%)                                | 3 (25%)                               |
| Post-neurosurgery         | 4 (33%)                               | 4 (33%)                               |
| Trauma                    | 7 (58%)                               | 5 (42%)                               |

Data are mean ± SD values, median (interquartile range) values, or number (%) as indicated.

APACHE II, Acute Physiology and Chronic Health Evaluation II; CHO, carbohydrate; ICU, intensive care unit.
